# Supplementary material for: NAMPT‐Driven M2 Polarization of Tumor‐Associated Macrophages Leads to an Immunosuppressive Microenvironment in Colorectal Cancer
Source: PubMed Central journal article supplement (PMC11005718; doi:10.1002/advs.202303177), 2024-02-02
Supplement: ADVS-11-2303177-s001.pdf [file ADVS-11-2303177-s001.pdf]

## Supporting Information

for *Adv. Sci.*, DOI 10.1002/adv.202303177

NAMPT-Driven M2 Polarization of Tumor-Associated Macrophages Leads to an Immunosuppressive Microenvironment in Colorectal Cancer

*Sun Mi Hong, A-Yeon Lee, Byeong-Ju Kim, Jeong-Eun Lee, Su-Yeon Seon, Yu-Jin Ha, Jestlin Tianthing Ng, Gyesoon Yoon, Su Bin Lim, Michael J. Morgan, Jong-Ho Cha, Dakeun Lee and You-Sun Kim\**

## Supporting Information

### **NAMPT-Driven M2 Polarization of Tumor-Associated Macrophages Leads to an Immunosuppressive Microenvironment in Colorectal Cancer**

Sun Mi Hong<sup>1#</sup>, A-Yeon Lee<sup>1,2#</sup>, Byeong-Ju Kim<sup>1,2</sup>, Jeong-Eun Lee<sup>1,2</sup>, Su-Yeon Seon<sup>1,2</sup>, Yu-Jin Ha<sup>1,2</sup>, Jestlin Tianthing Ng<sup>1,2</sup>, Gyesoon Yoon<sup>1,2</sup>, Su Bin Lim<sup>1,2</sup>, Michael J. Morgan<sup>3</sup>, Jong-Ho Cha<sup>4,5</sup>, Dakeun Lee<sup>2,6</sup>, You-Sun Kim<sup>1,2\*</sup>

<sup>1</sup> *Department of Biochemistry, Ajou University School of Medicine, 164 Worldcup-ro, Yeongtong-gu, Suwon, Gyeonggi-do, 16499, Republic of Korea*

<sup>2</sup> *Department of Biomedical Sciences, Graduate School of Ajou University, 164 Worldcup-ro, Yeongtong-gu, Suwon, Gyeonggi-do, 16499, Republic of Korea*

<sup>3</sup> *Department of Natural Sciences, Northeastern State University, Tahlequah, OK, 74464, USA.*

<sup>4</sup> *Department of Biomedical Sciences, College of Medicine, Inha University, Incheon 22212, South Korea.*

<sup>5</sup> *Department of Biomedical Science and Engineering, Graduate School, Inha University, Incheon 22212, South Korea.*

<sup>6</sup> *Department of Pathology, Ajou University School of Medicine, 164 Worldcup-ro, Yeongtong-gu, Suwon, Gyeonggi-do, 16499, Republic of Korea*

# These authors contributed equally to this work.

#### **\*Corresponding author**

You-Sun Kim, Ph.D.

Department of Biochemistry, Ajou University School of Medicine,

164 Worldcup-ro, Yeongtong-gu, Suwon, Gyeonggi-do, 16499, Republic of Korea

Tel: 82-31-219-4509, Fax: 82-31-219-4530, E-mail: [yousunkim@ajou.ac.kr](mailto:yousunkim@ajou.ac.kr)

**Fig. S1**

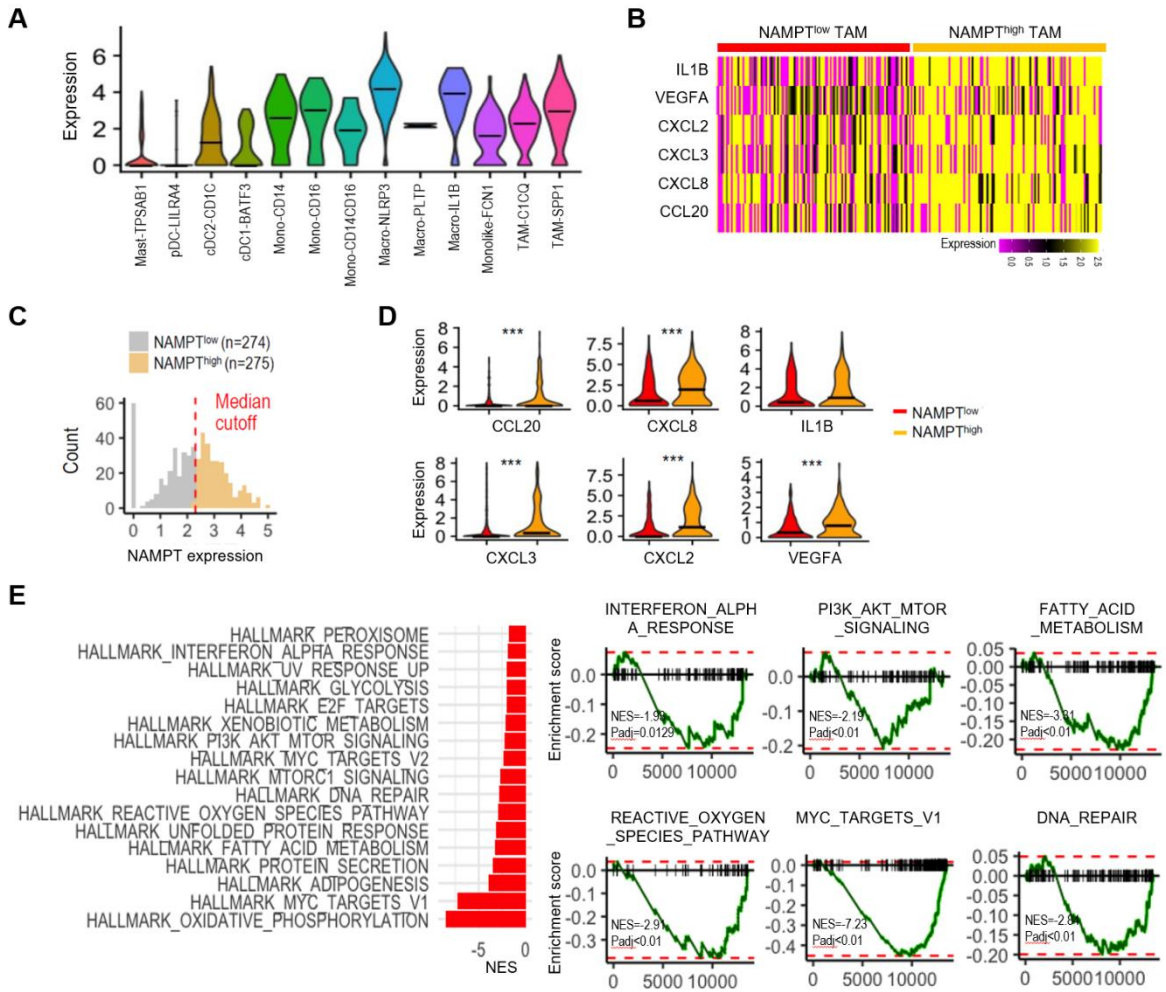

**Supplementary Figure 1. High expression of *NAMPT* in tumor-specific macrophages, *NAMPT*<sup>high</sup>*SPPI*<sup>+</sup> TAMs is associated with pro-tumoral TAMs.**

**A,** Relative expression of *NAMPT* in tumor tissues as grouped by myeloid cell clusters. The black line represents median expression.

**B,** Heatmap showing mRNA expression of *IL1B*, *VEGFA*, *CXCL2*, *CXCL3*, *CXCL8*, and *CCL20* in *SPPI*<sup>+</sup> TAMs, which are clustered into *NAMPT*<sup>low</sup> and *NAMPT*<sup>high</sup> groups.

**C,** Density plot showing distribution of *NAMPT* expression in *NAMPT*<sup>high</sup> and *NAMPT*<sup>low</sup> groups in *C1CQ*<sup>+</sup> TAMs.

**D,** Relative expression of known TAM markers mediating M1/M2 polarization in *C1CQ*<sup>+</sup> TAMs. T-test p values (\*<0.05, \*\*<0.01, \*\*\*<0.001) are shown. The black line represents median expression.

**E,** Top enriched Hallmark gene sets in *NAMPT*<sup>low</sup> group compared to *NAMPT*<sup>high</sup> group *SPPI*<sup>+</sup> TAMs. Normalized enrichment scores (NES) are shown (left; adjusted p value<0.05). GSEA plots of selected top-ranked Hallmark gene sets are shown (right). NES and adjusted p values (P<sub>adj</sub>) are shown.

Fig. S2

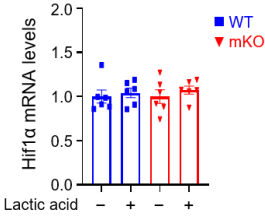

***Supplementary Figure 2. NAMPT does not increase the mRNA expression of Hif-1 $\alpha$  under lactic acid treatment.***

Relative mRNA expression of *Hif-1 $\alpha$*  in WT and *Nampt* KO macrophages treated with lactic acid. The mRNA expression of *Hif-1 $\alpha$*  was normalized to the mRNA levels of *Tbp1*. Results are represented as the mean  $\pm$  SEM. Statistical analysis was performed using the unpaired two-tailed Student's *t*-test.

**Fig. S3**

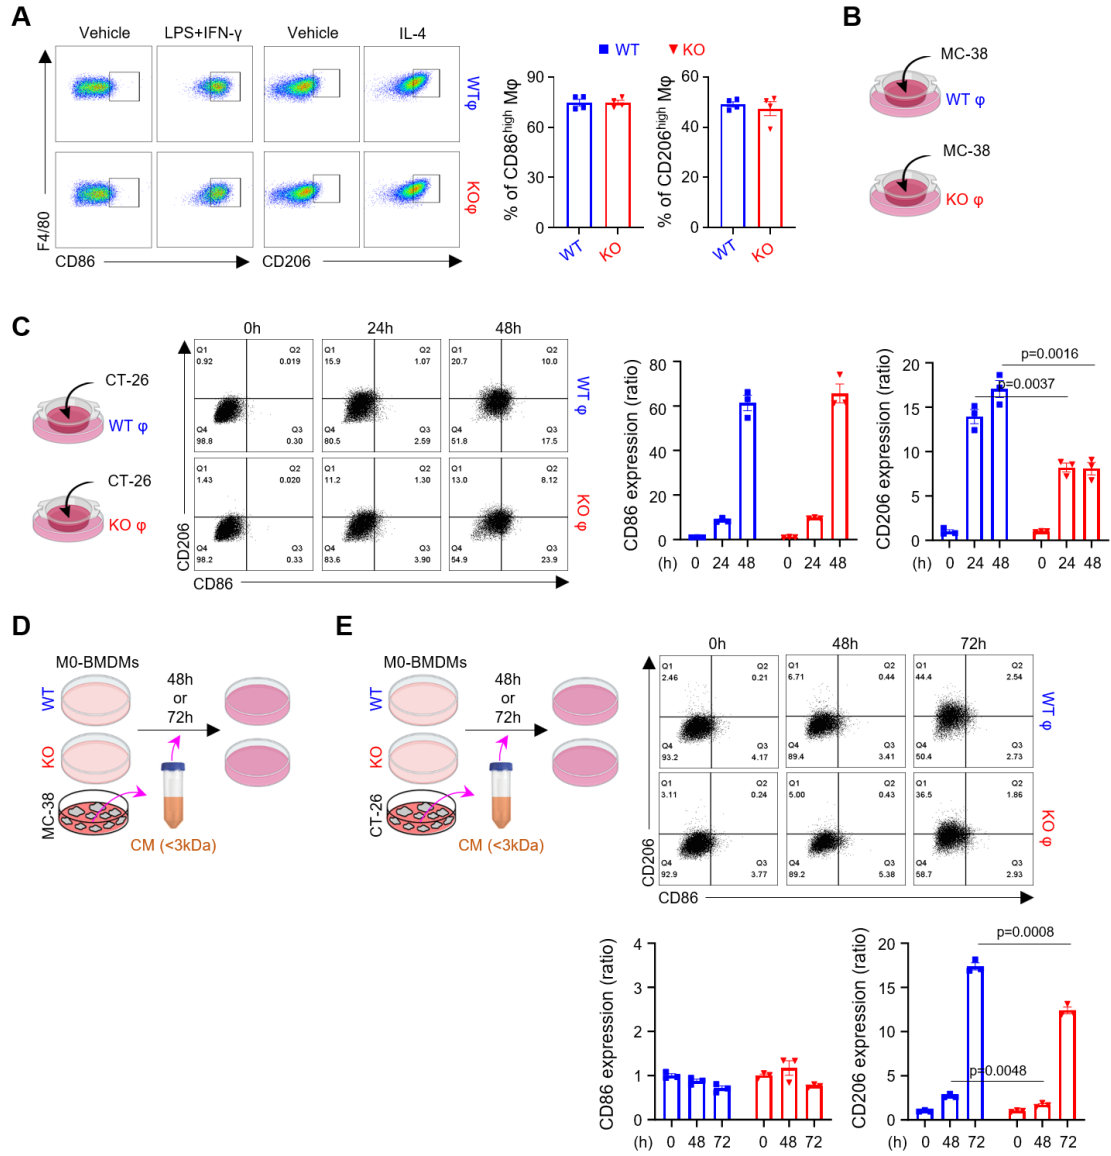

***Supplementary Figure 3. NAMPT likely drives cell-cell contact-, or secreted factor-mediated M2-like TAM polarization in TME.***

**A,** BMDMs from WT and *Nampt* mKO mice were treated with LPS/IFN- $\gamma$  or IL-4 and were evaluated for the expression of CD86, CD206 and F4/80 by flow cytometry.

**B,** Scheme depicting co-culture of BMDMs and colon cancer cells, MC38 cells using transwell plate in figure 3C.

**C,** BMDMs were co-cultured with CT26 cells using a transwell system for the indicated times. Representative flow cytometry plots and bar graph.

**D,** Diagram of workflow for figure 3D. The conditioned medium (CM) from MC38 cells was cut off <3kDa using by amicon. BMDMs from WT and *Nampt* mKO mice were cultured in CM (<3kDa).

**E,** BMDMs from WT and *Nampt* mKO mice were cultured in the CT26 tumor-conditioned medium (<3kDa) for the indicated times (left). Representative flow cytometry plots (middle) and bar graph (bottom). Results are represented as the mean  $\pm$  SEM. Statistical analysis was performed using the unpaired two-tailed Student's *t*-test.



Fig. S4

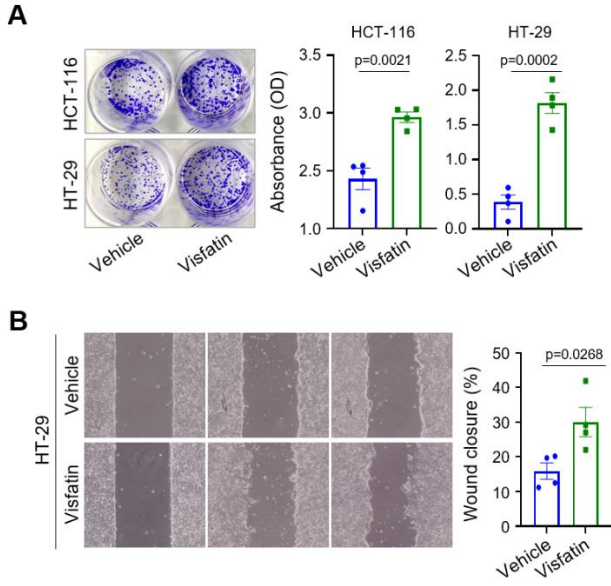

***Supplementary Figure 4. Extracellular NAMPT can promote tumor cell malignancy.***

**A,** Colony formation assays for HCT116 cells and HT-29 cells treated with 500 ng/mL extracellular NAMPT (visfatin) for 7 days.

**B,** Confluent monolayers of HCT116 cells and HT-29 cells were wounded after treatment with 500 ng/mL visfatin and then were cultured for 48 h. Results are represented as the mean  $\pm$  SEM. Statistical analysis was performed using the unpaired one-tailed Student's *t*-test.

Fig. S5

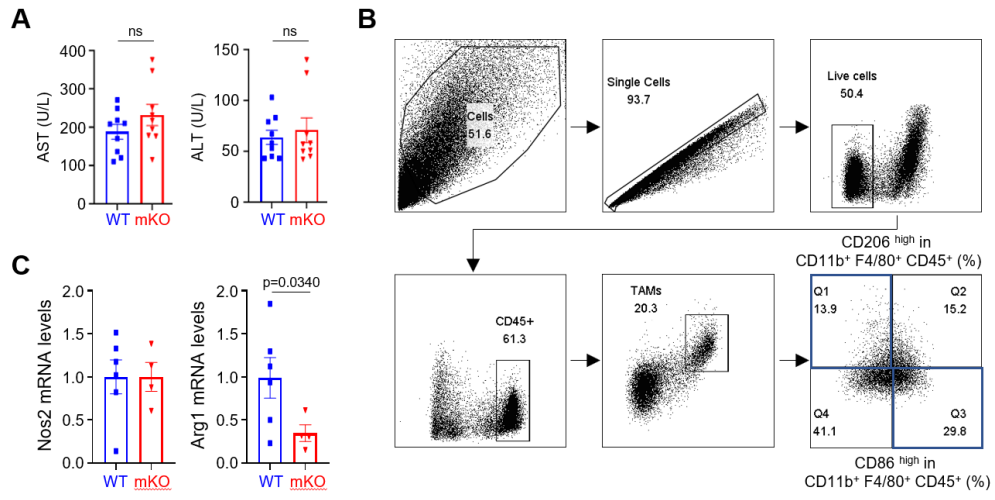

***Supplementary Figure 5. NAMPT inhibition reduces tumor outgrowth by limiting the population of immunosuppressive tumor-promoting M2-like TAMs.***

**A,** Serum ALT and AST levels from WT and *Nampt* mKO mice after MC38 cell inoculation.

**B,** Gating strategy for flow cytometry analysis of tumor tissues from WT and *Nampt* mKO mice is shown. After gating singlet, CD45<sup>+</sup> cells were analyzed with antibodies of CD11b and F4/80. The flow cytometry gating strategy used to define CD86<sup>high</sup> CD206<sup>low</sup> (M1-like) and CD206<sup>high</sup> CD86<sup>low</sup> (M2-like) macrophage subpopulation is shown in CD11b<sup>+</sup> F4/80<sup>+</sup> macrophages.

**C,** Relative expression of *Nos2* and *Arg1* mRNA in tumor tissues from WT and *Nampt* mKO mice is shown. The mRNA levels were normalized to the mRNA level of *Tbp1*. Results are represented as the mean  $\pm$  SEM. Statistical analysis was performed using the unpaired one-tailed Student's *t*-test.

**Fig. S6**

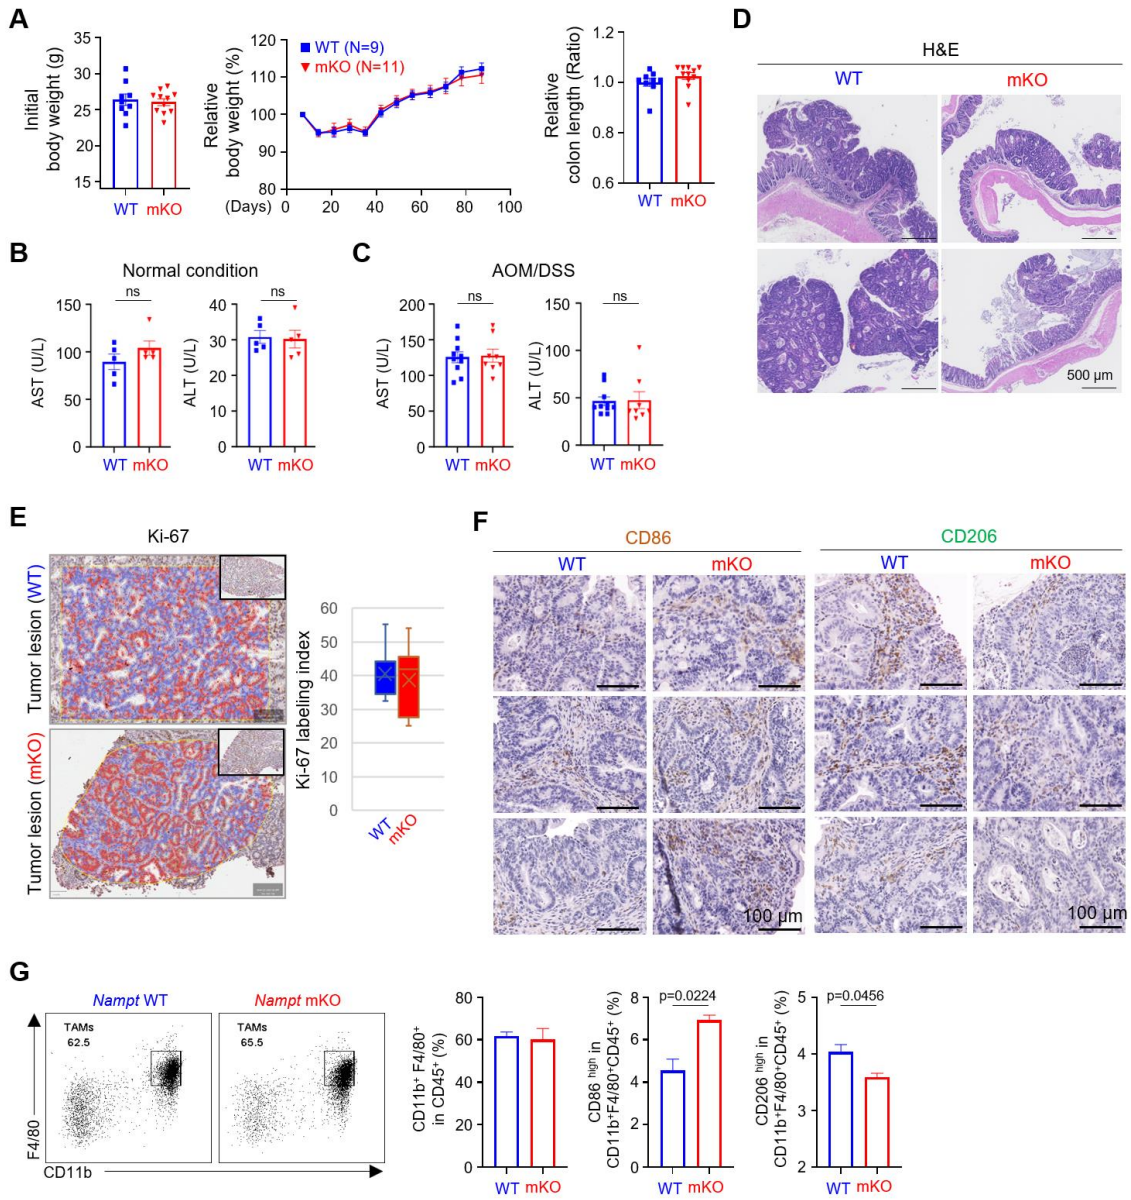

**Supplementary Figure 6. FACS analysis shows a reduced M2-like TAMs population in tumor-bearing *Nampt* mKO mice compared to WT mice.**

**A,** Initial body weight (left), body weight changes (middle) and relative colon length (right) of AOM/DSS-treated mice in figure 5A.

**B,** Serum ALT and AST levels from WT and *Nampt* mKO mice under normal conditions are shown.

**C,** Serum ALT and AST levels from WT and *Nampt* mKO mice 8 weeks after AOM/DSS treatment are shown.

**D,** Representative images of H&E staining of colonic tumor tissues. Scale bar = 500  $\mu$ m.

**E,** Quantification of Ki-67 positive areas in colonic tumor tissues from WT and *Nampt* mKO mice treated with AOM/DSS.

**F,** Immunohistochemistry of CD206 and CD86 in colonic tumor tissues from WT and *Nampt* mKO mice treated with AOM/DSS is shown. Scale bar = 100  $\mu$ m.

**G,** Proportion of TAMs among CD45<sup>+</sup> immune cells from WT and *Nampt* mKO groups is shown (left). Proportion of CD86<sup>high</sup> TAMs (M1-like TAMs) and CD206<sup>high</sup> TAMs (M2-like TAMs) in WT (n=4) and *Nampt* mKO groups (n=2) is shown (right). Results are represented as the mean  $\pm$  SEM. Statistical analysis was performed using the unpaired one-tailed Student's *t*-test.

**Fig. S7**

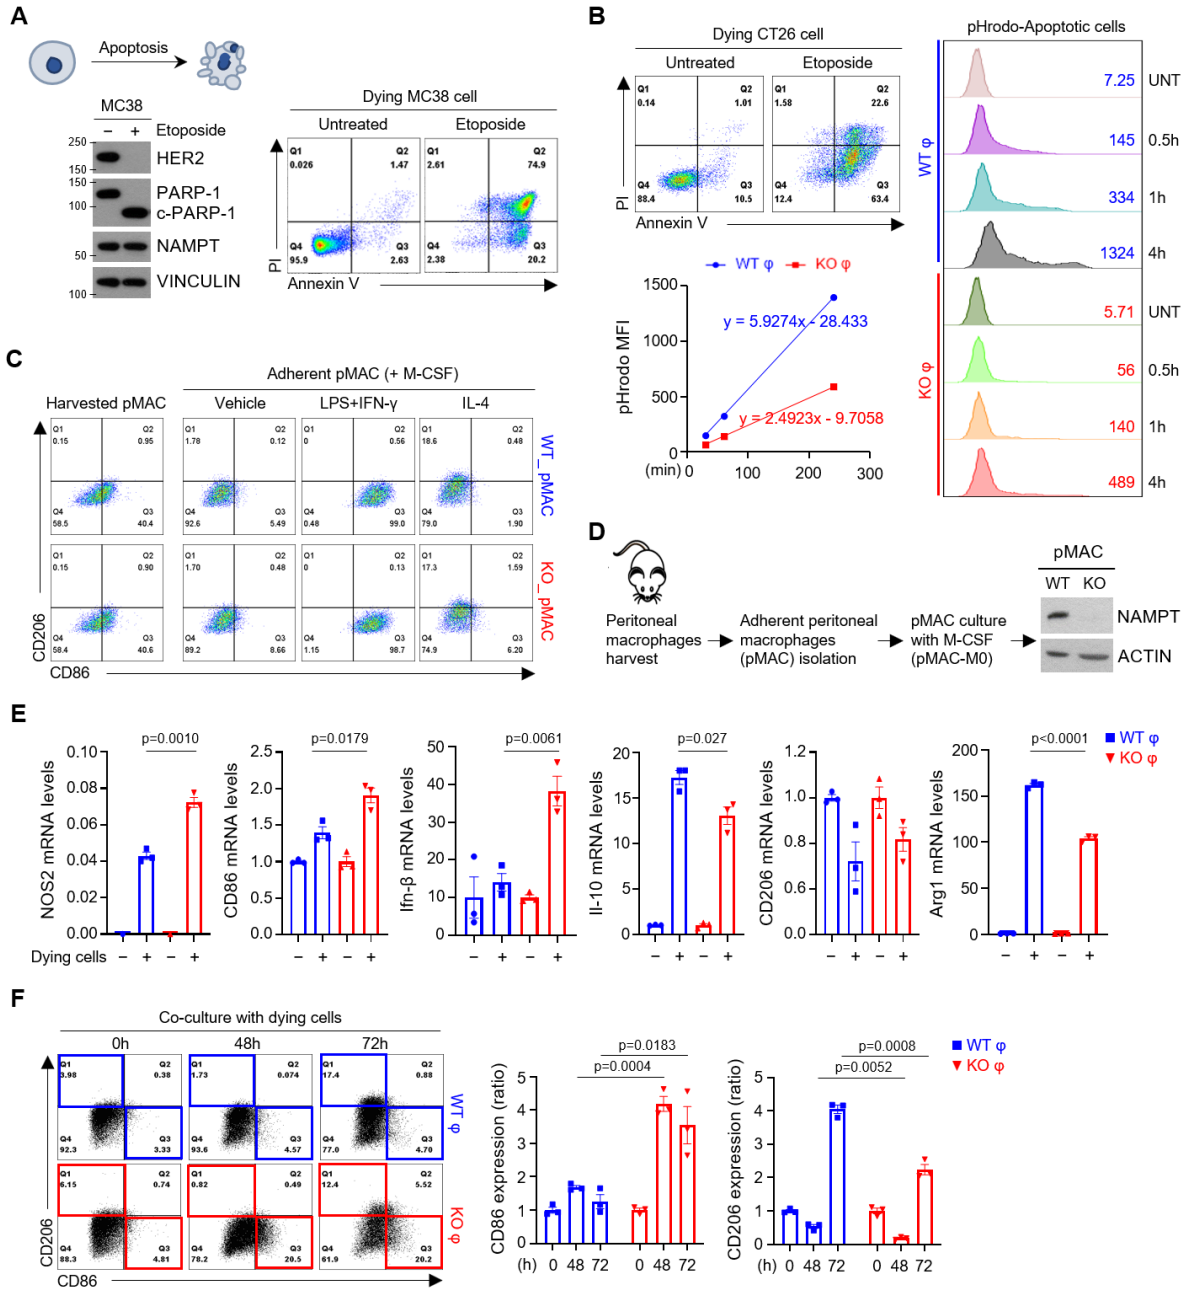

**Supplementary Figure 7. NAMPT deficient-macrophages have increased expression of MI phenotype markers.**

**A,** MC38 cells were treated with 150  $\mu$ M etoposide for 18 h. Cell lysates were analyzed by western blotting (left). Representative flow cytometry plots using Annexin V/PI staining for apoptosis are shown (right).

**B,** The phagocytic activity of BMDMs treated with LPS/IFN- $\gamma$  for 12 h was measured from 30 min to 240 min after adding dying CT26 cells (left upper) labeled with pHrodo green dye using flow cytometry (left bottom). Representative histogram of pHrodo intensity is shown (right).

**C,** pMAC from WT and *Nampt* mKO mice were treated with LPS/IFN- $\gamma$  or IL-4 and were evaluated for the expression of CD86 and CD206 in CD11b<sup>+</sup>F4/80<sup>+</sup> by FACS.

**D,** Diagram of workflow for figure 6C. The lysates of pMAC from WT and *Nampt* mKO mice were analyzed by western blotting.

**E,** BMDMs from WT and *Nampt* mKO mice were directly co-cultured with dying MC38 cells. mRNA expression levels of the indicated genes were analyzed by qRT-PCR. The mRNA levels were normalized to the mRNA level of *Tbp1*.

**F,** Flow cytometry analysis of CD86<sup>high</sup> and CD206<sup>high</sup> populations in CD11b<sup>+</sup>F4/80<sup>+</sup> BMDMs co-cultured with dying MC38 cells is shown. Representative flow cytometry plots (left) and bar graph (right). Results are represented as the mean  $\pm$  SEM. Statistical analysis was performed using the unpaired two-tailed Student's *t*-test.



**Fig. S8**

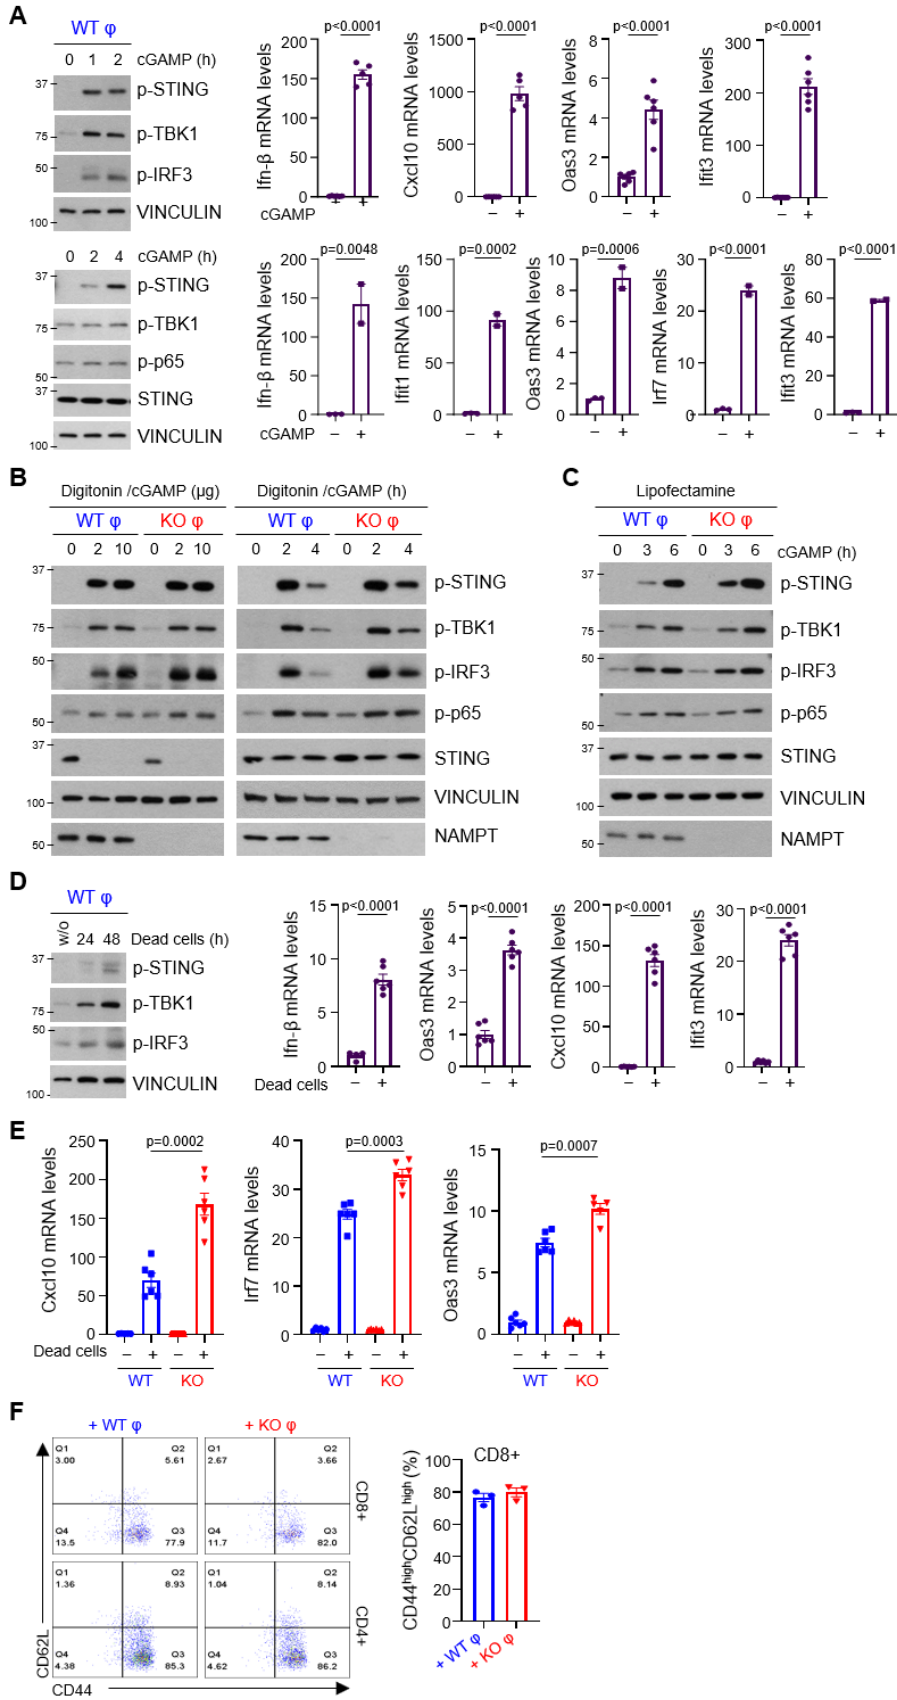

**Supplementary Figure 8. NAMPT deficiency in macrophages promotes anti-tumoral immunity through STING-dependent type I IFN responses.**

**A**, WT BMDMs were treated with 10  $\mu$ g cGAMP by using 5  $\mu$ g/mL digitonin permeabilization buffer (upper panel) or lipofectamine (lower panel) for the indicated times. Cell lysates were analyzed by western blotting (left). mRNA levels of *Ifn- $\beta$*  and IFN response genes were analyzed by qRT-PCR (right). mRNA levels of the indicated genes were normalized to the mRNA level of *Tbp1*.

**B-C**, BMDMs from WT and *Nampt* mKO mice were treated with cGAMP by using 5  $\mu$ g/mL digitonin permeabilization buffer (B) or lipofectamine (C). Cell lysates were analyzed by western blotting using the indicated antibodies.

**D**, WT BMDMs were treated with dying MC38 cells for the indicated times and cell lysates were analyzed by western blotting (left). mRNA levels of *Ifn- $\beta$*  and IFN response genes were analyzed by qRT-PCR (right). mRNA levels of the indicated genes were normalized to the mRNA level of *Tbp1*.

**E**, BMDMs from WT and *Nampt* mKO mice were incubated with dying MC38 cells for 24 h. The mRNA expression of IFN response genes were analyzed by qRT-PCR. mRNA expression of the indicated genes was normalized to the mRNA level of *Tbp1*.

**F**, M0 BMDMs from WT and *Nampt* mKO mice were incubated with splenocytes from naïve mice for 2 days. FACS analysis of the proportion of effector cells (CD44<sup>high</sup>CD62L<sup>low</sup>) of CD8<sup>+</sup> T cells co-cultured with TAMs is shown. Representative flow cytometry plots (left) and bar graph (right). Results are represented as the mean  $\pm$  SEM. Statistical analysis was performed using the unpaired two-tailed Student's *t*-test.

**Supplementary Table**

Table S1. Primer sequences used in qRT-PCR

| Species | Gene name                      |   | Sequence                  |
|---------|--------------------------------|---|---------------------------|
| mouse   | <i>Il-6</i>                    | F | AGTTCCTCTCTGCAAGAGACT     |
|         |                                | R | ATGTGTAATTAAGCCTCCGACTT   |
|         | <i>Il-10</i>                   | F | TTACTGACTGGCATGAGGATCA    |
|         |                                | R | AAGGAGTCGGTTAGCAGTATGT    |
|         | <i>Tgf-<math>\beta</math></i>  | F | AGGGCTACCATGCCAACTTC      |
|         |                                | R | CCACGTAGTAGACGATGGGC      |
|         | <i>Tnf-<math>\alpha</math></i> | F | TATGTCTCAGCCTCTTCTCATTC   |
|         |                                | R | GTCACTCGAATTTTGAGAAGATGAT |

|              |   |                            |
|--------------|---|----------------------------|
| <i>Il-17</i> | F | GCTGACCCCTAAGAAACCCC       |
|              | R | GAAGCAGTTTGGGACCCCTT       |
| <i>Ifn-β</i> | F | AACTATAAGCAGCTCCAGCTC      |
|              | R | CTTGGATGGCAAAGGCAGTG       |
| <i>Cd206</i> | F | ATCTCTGTCATCCCTGTCTCT      |
|              | R | ACTCATGATCTGAGAATCTGACA    |
| <i>Arg-1</i> | F | AAGAATGGAAGAGTCAGTGTGGT    |
|              | R | TGCAGATTCCCAGAGCTGGT       |
| <i>Spp1</i>  | F | TGACCCATCTCAGAAGCAGA       |
|              | R | TGGTCTCCATCGTCATCATCAT     |
| <i>Pdgf</i>  | F | CACAGAGACTCCGTAGATGAAG     |
|              | R | TTGCACTCGGCGATTACAG        |
| <i>Flt1</i>  | F | GATATGGCTCAGGGTCGAA        |
|              | R | GTGCTGCAGAATTGCCTGTTATC    |
| <i>Mct1</i>  | F | TGTTAGTCGGAGCCTTCATTTC     |
|              | R | CACTGGTCGTTGCACTGAATA      |
| <i>Mct4</i>  | F | TCAATCATGGTGCTGGGA         |
|              | R | GGCAAAGCTGAAGAGGTAGA       |
| <i>Tyro3</i> | F | AACGCATTGAGGCCACATT        |
|              | R | CTTGAGGCAATGATGTCAGCTTT    |
| <i>Axl</i>   | F | GAAAGAGGTGAACTGGTAGTCA     |
|              | R | ATTGAGCTGACCTTCCATCAC      |
| <i>Mertk</i> | F | CTGTAGCACCTTTAAACATCACTGTG |
|              | R | CATTGTGGATTTGGACAGGAATCT   |
| <i>Ifit3</i> | F | AATCTCTGGAAGCGATCCTTC      |
|              | R | ACATTGTTGCCTTCTCCTCAGA     |

|       |               |   |                           |
|-------|---------------|---|---------------------------|
| mouse | <i>Oasl1</i>  | F | AGAGTGGAAGAAGAGGTCCT      |
|       |               | R | TGTGGAAACAGCTCAGGAACA     |
|       | <i>Ccl5</i>   | F | TCACCATCATCCTCACTGCA      |
|       |               | R | AAGATTGGAGCACTTGCTGCT     |
|       | <i>Cd86</i>   | F | ATGCACCATGGGCTTGGCAA      |
|       |               | R | AACTTTTGCTGGTCCTGCCAAA    |
|       | <i>Nos2</i>   | F | TCTTCAAAGTCAAATCCTACCAAAG |
|       |               | R | TCGATGTCACATGCAGCTTGT     |
|       | <i>Ifit1</i>  | F | TCAGCTGAGATGTCACTTCACA    |
|       |               | R | AGCTGCTCGCTCTGGATCAA      |
|       | <i>Cxcl10</i> | F | CATTTTCTGCCTCATCCTGCT     |
|       |               | R | TGGTCTTAGATTCCGGATTGAG    |

|  |             |   |                        |
|--|-------------|---|------------------------|
|  | <i>Oas3</i> | F | CAGAGACCAAGAGTGATAAGGA |
|  |             | R | ATCCTGGACGCCTTTGACTG   |
|  | <i>Irf7</i> | F | TGAACGAGGCTCGCACAGT    |
|  |             | R | TCTTCCAGCCTCTTCGCTCT   |
